# Supplementary material for: Enhanced perovskite electronic properties via a modified lead(ii) chloride Lewis acid–base adduct and their effect in high-efficiency perovskite solar cells
Source: Royal Society of Chemistry journal article supplement (doi:10.1039/c6ta11139d), 2017-01-01
Supplement: c6ta11139d1.pdf [file c6ta11139d1.pdf]

## Supporting Information for

# Enhanced Perovskite Electronic Properties via a modified Lead(II) Chloride Lewis Acid-Base Adduct and Their Effect in High- Efficiency Perovskite Solar Cells

**Ngoc Duy Pham,<sup>a</sup> Vincent Tiing Tiong,<sup>a</sup> Peng Chen,<sup>b</sup> Lianzhou Wang,<sup>b</sup> Gregory J. Wilson,<sup>c</sup>**

**John Bell<sup>a</sup> and Hongxia Wang<sup>a\*</sup>**

<sup>a</sup> School of Chemistry, Physics and Mechanical Engineering, Science and Engineering Faculty,  
Queensland University of Technology, Brisbane, Australia

<sup>b</sup> School of Chemical Engineering and Australian Institute for Bioengineering and Nanotechnology,  
The University of Queensland, St Lucia, Brisbane, 4072, Australia

<sup>c</sup> CSIRO Energy, Mayfield West, NSW 2304, Australia

Corresponding author:

\*E-mail: [hx.wang@qut.edu.au](mailto:hx.wang@qut.edu.au)

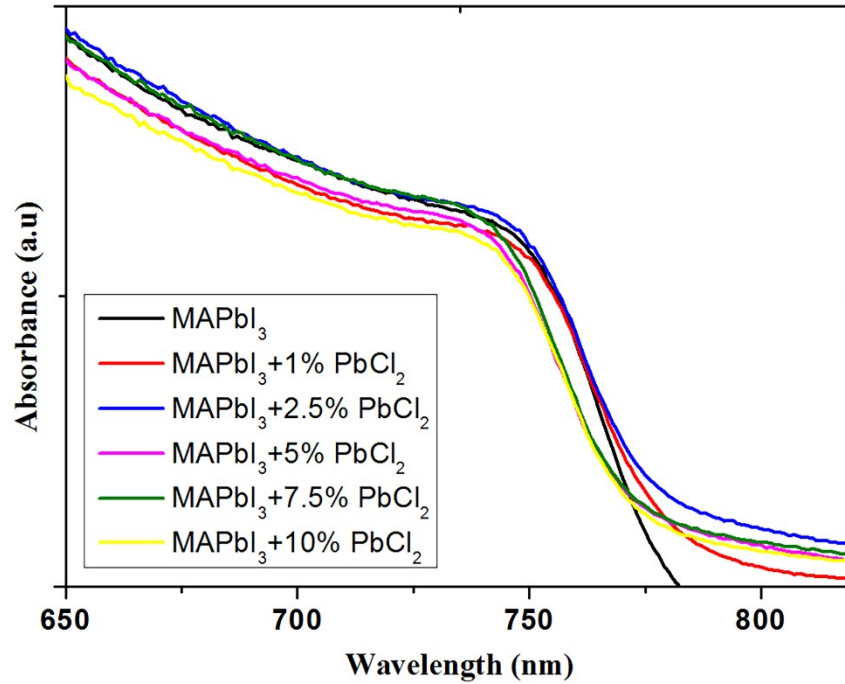

**Fig. S1** Ultraviolet-Visible absorption spectra of perovskite films with different  $\text{PbCl}_2$ -additive in perovskite precursor.

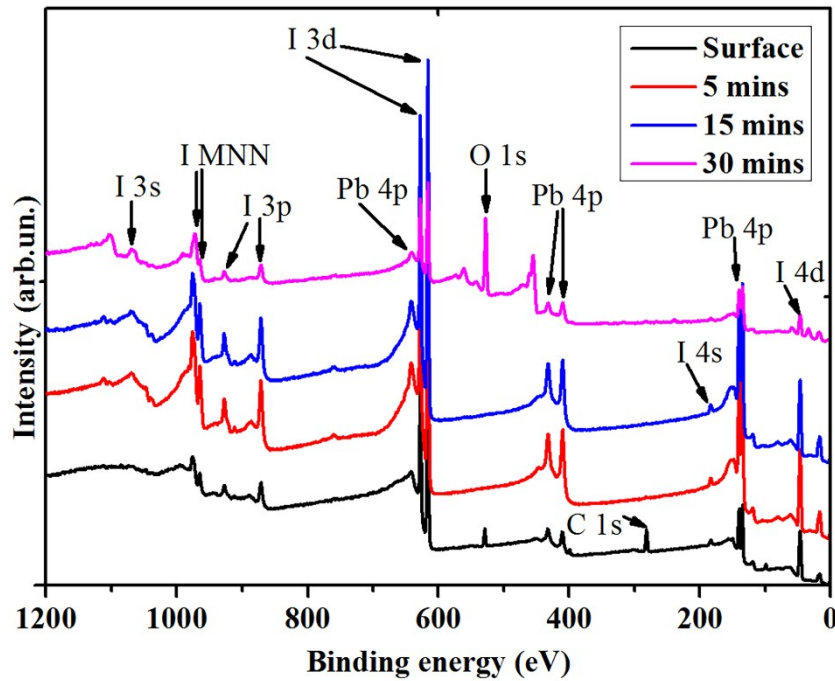

**Fig. S2** XPS depth profiling of perovskite film with 2.5 %  $\text{PbCl}_2$  in perovskite precursor with different etching time.
